1 **Transmission network reconstruction for foot-and-mouth disease outbreaks incorporating farm-**  
2 **level covariates**

3 Simon M. Firestone<sup>1\*</sup>, Yoko Hayama<sup>2</sup>, Max S. Y. Lau<sup>3</sup>, Takehisa Yamamoto<sup>2</sup>, Tatsuya Nishi<sup>4</sup>, Richard A.  
4 Bradhurst<sup>5</sup>, Haydar Demirhan<sup>6</sup>, Mark A. Stevenson<sup>1</sup>, Toshiyuki Tsutsui<sup>2</sup>

5

6 <sup>1</sup> Melbourne Veterinary School, Faculty of Veterinary and Agricultural Sciences, The University of  
7 Melbourne, Parkville, VIC 3010, Australia

8 <sup>2</sup> Viral Disease and Epidemiology Research Division, National Institute of Animal Health, National  
9 Agriculture Research Organization, Tsukuba, Ibaraki 305-0856, Japan

10 <sup>3</sup> Department of Biostatistics and Bioinformatics, Rollins School of Public Health, Emory University,  
11 Atlanta, Georgia, United States of America

12 <sup>4</sup> Exotic Disease Research Station, National Institute of Animal Health, National Agriculture and Food  
13 Research Organization, Kodaira, Tokyo, 187-0022, Japan

14 <sup>5</sup> Centre of Excellence for Biosecurity Risk Assessment, The University of Melbourne, Parkville, VIC  
15 3010, Australia

16 <sup>6</sup> Mathematical Sciences Discipline, School of Science, RMIT University, Melbourne, VIC 3000,  
17 Australia

18 \* Corresponding author: [simon.firestone@unimelb.edu.au](mailto:simon.firestone@unimelb.edu.au)

19

20 **Abstract**

21 Transmission network modelling to infer ‘who infected whom’ in infectious disease outbreaks is a  
22 highly active area of research. Outbreaks of foot-and-mouth disease have been a key focus of  
23 transmission network models that integrate genomic and epidemiological data. The aim of this study  
24 was to extend Lau’s systematic Bayesian inference framework to incorporate additional parameters  
25 representing predominant species and numbers of animals held on a farm.

26

27 Lau’s Bayesian Markov chain Monte Carlo algorithm was reformulated, verified and pseudo-  
28 validated on simulated outbreaks populated with demographic data Japan and Australia. The  
29 modified model was then implemented on genomic and epidemiological data from the 2010  
30 outbreak of foot-and-mouth disease in Japan, and outputs compared to those from the SCOTTI  
31 model implemented in BEAST2.

32

33 The modified model achieved improvements in overall accuracy when tested on the simulated  
34 outbreaks. When implemented on the actual outbreak data from Japan, infected farms that held  
35 predominantly pigs were estimated to have five times the transmissibility of infected cattle farms  
36 and be 49% less susceptible. The farm-level incubation period was 1 day shorter than the latent  
37 period, the timing of the seeding of the outbreak in Japan was inferred, as were key linkages  
38 between clusters and features of farms involved in widespread dissemination of this outbreak. To  
39 improve accessibility the modified model has been implemented as the R package ‘BORIS’ for use in  
40 future outbreaks.

41

42

## 43 **Introduction**

44 Outbreaks of foot-and-mouth disease (FMD) in previously free countries cause severe and  
45 widespread socio-economic impacts [1]. FMD-free countries therefore have stringent biosecurity  
46 measures in place to prevent incursions and investigate outbreaks very thoroughly. Following a  
47 review of outbreaks in non-endemic regions covering the period 1992 to 2003 [2], there have been a  
48 series of costly outbreaks in previously free countries, including those in the United Kingdom in 2007  
49 [3], Taiwan in 2009 [4], Japan in 2010 [5] and three independent introductions into South Korea  
50 between 2010 and 2011 [6]. Many of these outbreaks are detailed in a recent review [7].

51

52 The inference of ‘who infected whom’ in infectious disease outbreaks has gained considerable  
53 momentum in the wake of rapid advances in genome sequencing [8]. Accurate inference of the  
54 transmission network and epidemiological parameters can aide in decision-making in the early  
55 phases of an outbreak in numerous ways, including: assisting in targeting who to investigate;  
56 uncovering whether unsampled (and possibly as yet undetected) sources are seeding new clusters;  
57 and establishing whether or not control measures, as implemented, are effectively breaking  
58 transmission. Retrospective reconstruction of outbreak networks is useful for establishing risk  
59 factors for transmission and failures in biosecurity, targeting surveillance and planning for how to  
60 respond most appropriately to future outbreaks. Bayesian models that combine genomic and  
61 epidemiological data to infer the transmission network of outbreaks have been developed for a  
62 range of emerging infectious diseases and transboundary animal diseases including highly  
63 pathogenic avian influenza [9, 10], Ebola [11] and FMD [10, 12-14]. These have recently been  
64 reviewed and benchmarked for application in FMD outbreaks [15]. The best-performing approaches  
65 in that previous analyses were Lau’s joint Bayesian inference framework [12], the Structured  
66 Coalescent Transmission Tree Inference (SCOTTI) model version 1.1.1 [14] and a modification to

67 Cottam's original frequentist approach [15, 16]. None of these models include farm-level covariates  
68 other than the spatial relationship between farm locations.

69

70 In April 2010, an outbreak of FMD was detected in the Miyazaki Prefecture of Japan. This was the  
71 first outbreak in the country for 10 years and prior to this outbreak vaccination had not been  
72 practiced for FMD in Japan. The earliest detected infected premises (IPs) included mostly beef cattle  
73 farms, with rapid spread to pig and dairy cattle farms across the extent of the Prefecture. The  
74 outbreak was officially detected on 20 April 2010 based on PCR positive test results on samples from  
75 cattle at a fattening farm, though non-specific clinical signs had first been detected, but not  
76 diagnosed as FMD, in a cow on this farm on 9 April 2010, and even earlier, on 31 March 2010 in  
77 water buffalo on a nearby farm [17]. The outbreak lasted 2.5 months, during which time 292 IPs  
78 were detected and around 200,000 infected animals (cattle, pigs, water buffalos, goats and sheep)  
79 were culled to contain spread. A further 87,000 animals that were vaccinated during the control  
80 program were also slaughtered to expedite the resumption of international trade in livestock  
81 produce. Detailed epidemiological descriptions of the outbreak, genomic analyses, risk factor  
82 investigations and simulation studies have been published [5, 17-23].

83

84 The aim of the present study was to extend Lau's systematic Bayesian inference framework to  
85 incorporate farm-level covariates representing the predominant species and numbers of animals  
86 held on infected farms. Specific further objectives included evaluating the performance of the  
87 modified model in characterising the transmission process, and estimating key epidemiological and  
88 phylogenetic parameters on data from the 2010 FMD outbreak in Japan, alongside other available  
89 approaches.

90

91

## 92 **Materials and Methods**

### 93 ***Model formulation and modification***

94 The model developed here is an adaptation of Lau's joint Bayesian Markov Chain Monte Carlo  
95 (MCMC) inference framework [11, 12]. In Lau's original model, the total probability of individual  $j$   
96 becoming infected during time period  $[t, t + dt]$  was given by:

$$r(j, t, dt) = \left\{ \alpha + \sum_{i \in \xi_j(t)} \beta k_{d_{ij}} \right\} dt + o(dt) \quad (1)$$

97 where  $\xi_j(t)$  is the set of all infectious premises at time  $t$ ,  $\alpha$  is the background rate of infection,  $\beta$  is the  
98 secondary transmission rate,  $k_{d_{ij}}$  is a transmission kernel function used to represent the spatial  
99 relationship between premises with  $o(dt)$  representing probability of individual  $j$  being infected by  
100 multiple sources of infection in the small period  $dt$ , here the power law kernel was assumed of the  
101 form:

$$k_{d_{ij}} = \frac{1}{1 + d_{ij}^\kappa} \quad (2)$$

102 where  $d_{ij}$  is the Euclidean distance between the premises and  $\kappa$  is an inferred parameter. Other  
103 options for the spatial kernel include exponential, Cauchy and Gaussian decay (not tested here).

104

105 In the present analysis, the term  $\beta$  in equation (1) was reformulated as  $\beta_{ij}$  to incorporate additional  
106 terms that represent modifications to the transmissibility of each infectious farm,  $Inf_i$ , and the  
107 susceptibility of each susceptible farm,  $Susc_j$ , such that:

108

$$\beta_{ij} = \beta \times Inf_i \times Susc_j \quad (3)$$

$$Inf_i = n_i^\nu \times (\phi_{cattle} \cdot ftype0 + \phi_{pig} \cdot ftype1 + \phi_{other} \cdot ftype2) \quad (4)$$

$$Susc_j = n_j^\tau \times (\rho_{cattle} \cdot ftype0 + \rho_{pig} \cdot ftype1 + \rho_{other} \cdot ftype2) \quad (5)$$

109

110 where  $n_i$  and  $n_j$  represent the number of animals on premises  $i$  and  $j$ , respectively, and  $\nu$  and  $\tau$  are  
111 inferred parameters that allow for nonlinear effects of holding size [24]. We allowed three levels  
112 (modulated by an indicator variable for farm type,  $ftype$ ) for inferred parameters representing the  
113 effect of the predominant species on premises  $i$  and  $j$  on transmissibility, such that  $\phi_{pig}$  and  $\phi_{other}$   
114 represented the component of instantaneous hazard modified by the infectiousness of  
115 predominantly pig and other farms (compared to a reference category of predominantly cattle  
116 farms, i.e.  $\phi_{cattle}=1$ ), respectively, and  $\rho_{pig}$  and  $\rho_{other}$  represented the susceptibility of predominantly  
117 pig and other farms (compared to a reference category of predominantly cattle farms,  $\rho_{cattle}=1$ ),  
118 respectively. This accounts for a well described biological feature of transmission whereby the  
119 minimum infectious doses by inhalation for cattle, sheep and goats are much lower than those of  
120 pigs, whereas infectious pigs excrete considerably more virus than these ruminant species [25] and is  
121 similar in underlying structure to one of the key simulation models implemented on data from the  
122 2001 FMD outbreak in the United Kingdom [24, 26]. The parameter  $\beta$  was retained for scaling  
123 purposes. A further modification to the model was also tested, where the infectivity and  
124 susceptibility terms were normalised by the population mean infectivity and susceptibility,  
125 respectively.

126

### 127 **Model verification and pseudo-validation**

128 The modified model was verified on three FMD outbreak datasets simulated following a previously  
129 described approach [27] based on Sellke thresholds [28]. These ‘model verification’ simulation runs  
130 (designated J1–J3) were parameterised with the same underlying population structure as areas of

131 Miyazaki Prefecture in Japan from 2010, with differing numbers of susceptible farms and different  
132 plausible transmission and genomic parameters.

133

134 The modified model was then pseudo-validated by testing on three previously described FMD  
135 outbreak datasets simulated in the Australian Animal Disease Simulation (AADIS) model [29], a  
136 completely different modelling framework. Corresponding phylogenetic trees nested within the  
137 known transmission networks were simulated with VirusTreeSimulator  
138 (<https://github.com/PangeaHIV/VirusTreeSimulator>; last accessed 31 October, 2017) and SeqGen  
139 version 1.3.3 [30]. These simulated Australian FMD outbreak datasets were designated A1–A3. All  
140 simulated datasets are provided in supplementary materials (S1) along with detailed descriptions of  
141 their parameterisation.

142

#### 143 ***Case study: 2010 outbreak of FMD in Miyazaki Prefecture, Japan***

144 The 2010 Miyazaki FMD outbreak datasets analysed were provided by the National Institute of  
145 Animal Health and comprised premises-level covariate data on 292 infected premises and 104 L-  
146 fragment consensus nucleotide sequences of virus isolates from animals on these farms, prepared as  
147 previously described [5, 18, 20, 21]. Sequences were tested for recombination using RDP4 [31] and  
148 for the best fitting DNA substitution model using MEGA version 7.0 [32], as assessed based on the  
149 lowest Bayesian Information Criterion.

150

#### 151 ***Model implementation***

152 The modified joint Bayesian MCMC inference of the transmission tree was implemented on a  
153 parallel computing cluster with 4 chains of 1 million iterations, the first 20% of each discarded as  
154 burn-in and the remainder thinned by 1000 based on assessment of convergence and

155 autocorrelation, with Gelman and Rubin's shrink factor [33], visually and by calculation of  
156 autocorrelation and effective sample size using Tracer [34]. All unobserved parameters (Table 1)  
157 were given uninformative flat priors and imputed as described previously [12]. The MCMC was  
158 initialised with a transmission tree with initial sources selected randomly from amongst those  
159 estimated to hold infectious animals at the estimated time of exposure of each IP. If there were no  
160 potential sources at the estimated time of exposure of an IP the proposed source for this IP was  
161 initialised with a value to represent seeding from a non-observed IP. The initiating single universal  
162 master sequence was assumed to be the consensus sequence of all available genomic data.

163

#### 164 ***Comparative analyses***

165 The 2010 Miyazaki FMD outbreak dataset was also analysed by preparing temporal transmission  
166 windows [16] and inferring the transmission network and phylogenetic parameters with the SCOTTI  
167 model version 1.1.1 [14], implemented in BEAST version 2.4.7 [35]. The HKY substitution model [36]  
168 was assumed with 2 independent chains of 10 million MCMC iterations, each with 20% discarded as  
169 burn-in and thinned by 20000 based on assessment of convergence and autocorrelation. In this  
170 coalescent model with migration, each IP was modelled as a 'host', each with a distinct diverse  
171 pathogen population undergoing genetic evolution. Transmissions between hosts were modelled as  
172 'migration' events and the maximum number of hosts was set to 10 times the number of sequences  
173 available to allow for unobserved IPs, observed IPs for which genomic data was missing and seeding  
174 from external clusters. All unobserved parameters were given uninformative flat priors and the  
175 following were inferred: the mutation rate, the ratio of transitions to transversions, the rate of  
176 transmission between hosts, the total number of hosts (including non-sampled IPs), the number of  
177 pathogen lineages per host and the tree height (from which the delay between origin and detection  
178 of the outbreak could be estimated).

179



180 The code for implementing the modified Lau model has been incorporated into a freely available R  
181 package named Bayesian Outbreak Reconstruction, Inference and Simulation (BORIS) [37]. The  
182 descriptive analyses of all model outputs was undertaken in the R statistical package version 3.4.3  
183 [38], using the libraries epiR v0.9-93 [39], statnet v2016.9 [40], coda v0.19-1 [41] and ggplot2 [42]. In  
184 all comparisons, model accuracy in inferring the transmission network was considered as the  
185 proportion of infected premises for which the true source was the proposed source with the highest  
186 posterior probability density [15]. The effect of features of the inferred transmission network on the  
187 reproductive number was inferred as previously described [43].

188

## 189 **Results**

### 190 ***Model verification and pseudo-validation***

191 The modified version of the model demonstrated improved performance in each of the simulated  
192 model runs (Figure 1 and supplementary materials, S2). Overall accuracy improved by 6.2% in  
193 verification runs J1–J3 (range: 5.4–6.9%) and by 4.7% in pseudo-validation runs A1–A3 (range: 2.3–  
194 7.8%). Accuracy improvements occurred over the full range of model support values. Posterior  
195 probability density (model support) for proposed sources was higher for outputs from the modified  
196 versus the original model for all verification runs (Wilcoxon signed-rank p-values all <0.001) and  
197 comparable for pseudo-validation runs; higher support has previously been associated with higher  
198 accuracy. The performance of the modified-normalised version was very similar to the modified  
199 version without normalisation, with the non-normalised version demonstrating typically 1–2% better  
200 accuracy.

201

202 Posterior distributions of the inferred epidemiological and phylogenetic parameters are presented in  
203 Supplementary Materials S3 by model run, compared to the known values. In validation runs, the  
204 models were highly accurate and comparable in their inferences of  $\alpha$ , the mutation rate and

205 transition-to-transversion ratio, farm-level latent and infectious periods, the spatial kernel shape  
206 parameter ( $\kappa$ ), and the farm-level transmissibility ( $\phi$ ) and susceptibility ( $\rho$ ) weighting parameters,  
207 and indices for the effects of number of animals per farm ( $\nu$  and  $\tau$ ). In runs J1 and J2, the models  
208 were highly accurate in their inference of the secondary transmission rate ( $\beta$ ). In run J3, which had  
209 an extremely low value of  $\beta$  all of the models overestimated the true value of  $6 \times 10^{-4}$ . The modified  
210 model had the least discrepancy, with its highest probability density region (HPD) ranging from 2 to  
211 3 times the true value, the inferred values for the original and modified-normalised models were out  
212 by >200-fold. In pseudo-verification runs, the models were highly accurate and comparable in their  
213 inferences of the transition-to-transversion ratio, however all three models underestimated the  
214 mutation rate by between 41% and 49%. The rest of the inferred parameters are not directly  
215 analogous to those used in the simulation framework for pseudo-validation, so could not be directly  
216 compared to known values.

217

#### 218 ***Case study: 2010 outbreak of FMD in Miyazaki Prefecture, Japan***

219 Each of the 104 sequences were 7667 nucleotides in length, no recombination was detected. The  
220 best-fitting nucleotide substitution model was the Tamura-Nei (TN93) model with non-uniformity of  
221 the evolutionary rate among sites represented using a discretised Gamma distribution with five  
222 categories, an estimated shape parameter of 0.13, assuming that none of the sites were  
223 evolutionarily invariable and a transition to transversion ratio of 9.08 (see supplementary materials,  
224 S4 for further detailed results).

225

226 The transmission network inferred using the modified Lau MCMC algorithm is presented in arbitrary  
227 space in Figure 2. Posterior estimates of the key epidemiological and phylogenetic parameters from  
228 the modified version of the Lau model are presented in Table 2. Networks for the original and  
229 modified-normalised model formulations are provided as Supplementary Materials (S5) highlighting

230 differences to the presented network. The root of the inferred transmission tree was inferred with  
231 very high model support. Transmission from an external source was inferred to have most likely  
232 occurred 31 days prior to the outbreak being detected (i.e., on 19 March 2010; 95% HPD: 8 and 25  
233 March 2010). At the point of outbreak detection (on 20 April 2010) it was inferred that there were  
234 15 farms already infected. The median diagnostic delay (time from inferred exposure at a farm until  
235 day of sampling) was estimated to be 9.7 days (range: 4.6, 32.9 days).

236

237 Of the 292 IPs, only 47 had a proposed source from Lau's modified algorithm with model support  
238 >50%, of these only 18 links had model support >80%. Model support was highest for inferred  
239 transmission events earlier in the outbreak (geometric mean support for events in first 4 weeks was  
240 74.8%, whereas for events in the mid and latter 4-week periods of the outbreak geometric mean  
241 support was 24.1% and 12.2%, respectively), likely relating to the density of genomic sampling. The  
242 longest of the inferred chains of infection involved 8 transmission events, with 93% of transmission  
243 chains being  $\leq 5$  events in length. The scale-free properties of the transmission network's out degree  
244 distribution (coefficient of variability = 3.3), suggested a multiplying effect on the basic reproductive  
245 number of 12.0. The geometric mean number of secondarily infected premises for IPs exposed in the  
246 first 4 weeks of the outbreak was 5.9, dropping to 3.2 and 1.3 for IPs exposed in the middle and  
247 latter 4-week intervals of the outbreak, respectively. This demonstrates the effectiveness of animal  
248 movement controls and other measures.

249

250 Farms that kept predominantly pigs were 5.15 times more infectious than cattle farms (Table 2). The  
251 eleven farms that were inferred to have led to the highest number of secondary infections were all  
252 pig farms. Those farms that predominantly kept other species appeared less infectious than cattle  
253 farms, however as there were only five 'other' farms the HPD for  $\phi_{other}$  crossed the null value of 1.  
254 Farms that kept predominantly pigs were 49% less susceptible than cattle farms. Those farms that

255 predominantly kept other species were 55% less susceptibility than cattle farms (noting that the HPD  
256 again crossed 1, due to low numbers in this group). The number of animals on a farm had more  
257 influence on farm-level susceptibility than infectivity.

258

259 The posterior estimates of the mean farm-level incubation, latent and infectious periods were 5.9,  
260 6.8 and 15.2 days, respectively. Based on the shape of the inferred spatial transmission kernel  
261 (Figure 3), most of the density of risk is within 15 km of an infected premises. Most parameter  
262 inferences were highly comparable across model runs (modified versus original and normalised). An  
263 exception was the secondary transmission rate ( $\beta$ ) which from the modified-normalised model  
264 outputs was inferred to be an order of magnitude higher than as inferred in the original and  
265 modified formulation. The HPDs of most of the inferred parameters overlapped with those used in  
266 the model verification runs J1–J3.

267

### 268 ***Comparative analyses***

269 Transmission windows estimated by Cottam’s approach, are presented for the 20 IPs with earliest  
270 dates of onset in Figure 4. Based on this approach, at least ten IPs had already been exposed by the  
271 time the outbreak was detected. There were only seven IPs for which the Lau modified and SCOTTI  
272 models agreed on source. Amongst the 104 IPs for which genomic data were available, proposed  
273 sources for 13 IPs inferred by the SCOTTI algorithm were on the transmission pathways inferred by  
274 the Lau model (which included both sampled and unsampled sources).

275

276 The posterior median estimates of the substitution rate and transition to transversion ratio inferred  
277 by SCOTTI were highly comparable to those inferred by Lau’s model, with overlapping HPDs that also  
278 encompassed the maximum likelihood value estimated using MEGA. The SCOTTI model suggested

279 the sequence data were monophyletic (i.e., a single introduction), with only a single likely root and  
280 transmission from the original external source was estimated to have occurred 39 days prior to  
281 detection of the outbreak (i.e. on 12 March 2010). Onward transmission from the source occurred at  
282 a rate of 3.2 new infected premises per day over the course of the outbreak, with the median  
283 estimate of the number of FMD viral lineages within each farm being 19. Of those 104 IPs with  
284 genomic sequence data available, only 32 had consensus support that their proposed source was  
285 amongst those sampled and of these only 5 had >50% model support for their proposed ancestor  
286 (detailed results provided as Supplementary Materials, S6). Based on the structured coalescent  
287 transmission tree inference, there was very low likelihood that the source of infection for the first  
288 farm inferred to have been infected in this outbreak was amongst those sampled (support = 2.4%),  
289 whereas it was much more likely that the index farm's source was amongst those sampled (support  
290 = 33.4%) and model support that the index was infected by the first farm inferred to have been  
291 infected approached consensus (42.8%).

292

## 293 **Discussion**

294 Transmission network models that enable reconstruction of outbreaks hold considerable promise for  
295 informing decision-making in future outbreak responses if they are accurate, robust, reproducible,  
296 reliable and can be implemented with ease. Here, we have developed and evaluated an extended  
297 version of Lau's systematic Bayesian inference framework incorporating additional parameters to  
298 infer farm-level effects on transmissibility and susceptibility related to the predominant species on a  
299 property and the numbers of animals kept. The modified model demonstrated improved  
300 performance across a series of varied simulated outbreaks, with overall accuracy improving by  
301 between 5 and 6%. These improvements may seem modest unless considered from the perspective  
302 that Lau's original model was already a well-performing highly detailed inference as recently  
303 demonstrated [15] and the modified model is intended to be implemented in near-real time in

304 outbreaks involving hundreds of infected farms, where each correctly inferred link may aid the  
305 speed of containment and subsequently greatly reduce future outbreak impacts.

306

307 The inferred transmission network for the 2010 outbreak of FMD in Japan identified all key linkages  
308 between clusters and characterised features of important farms in widespread dissemination of this  
309 outbreak. Pig farms played a vital role, with most of the farms forming hubs in the transmission  
310 network holding predominantly pigs. This has previously been identified as key to dissemination of  
311 FMD [25, 44], however, with the inclusion of additional parameters, we were able to estimate the  
312 magnitude of this effect alongside other important epidemiological and phylogenetic parameters.

313 The five-fold increase in transmissibility of pig farms compared to farms holding predominantly  
314 cattle is biologically plausible and agrees with published accounts that, depending on FMD strain,  
315 pigs can excrete up to 100 times more airborne virus at the peak of the viraemic phase than cattle  
316 [25]. Whilst pigs may excrete more virus than ruminants, cattle on a downwind farm are more  
317 susceptible to infection via inhalation. Although pig farms tend to hold more animals, they also  
318 typically implement management measures specifically focussed on hygiene, biosecurity, ventilation,  
319 humidity and temperature control, odour and pollution reduction that would be expected to  
320 influence and often reduce the potential for disease dissemination.

321

322 The effect of numbers of animals held suggested farm size had more of an influence on farm  
323 susceptibility than transmissibility, however the HPDs of the inferred parameters representing these  
324 non-linear effects overlapped considerably. This modification was stimulated by the formulation of  
325 previous FMD models for the 2001 outbreak in the United Kingdom [24] and despite minor  
326 differences in parameterisation the estimates were all reasonably close to those fit to that prior  
327 outbreak. In some of the regions previously studied in the UK 2001 outbreak, numbers of animals  
328 held influenced transmissibility more than susceptibility, but the finding was not consistent. Such

329 differences likely relate to differences in the predominance of sheep versus pigs in different regions  
330 and their differing influences on transmission. In their analysis, Tildesley and colleagues (2008)  
331 included species-specific parameters to represent the nonlinear influence of numbers of animals  
332 held. When we attempted to include such species-specific parameters in the modification to Lau's  
333 approach, this led to over-parameterisation and presumed identifiability issues impacting on MCMC  
334 chain mixing and convergence. We therefore settled for a single parameter for each effect, assuming  
335 that species-specific effects should be well represented by the specific farm-level susceptibility and  
336 transmissibility terms.

337

338 The inferred farm-level incubation period in the 2010 FMD outbreak in Japan of 2–14 days  
339 corresponds very closely with previously published data [25, 45]. Interestingly, at the farm-level, the  
340 median inferred incubation period was 1 day shorter than the median latent period. This finding is  
341 consistent with an experimental study where the relationship between onset of infectiousness was  
342 based on directly demonstrating FMD transmission to another animal [46]. In contrast, many studies  
343 that have considered onset of infectiousness at the farm-level based on proxy measures (such as  
344 detection of virus in blood, nasal fluid and/or oesophageal-pharyngeal fluid) [45] may have  
345 underestimated the duration of the latent period [46]. Whilst individual animals have been shown to  
346 excrete FMD virus 1–2 days before onset of clinical signs [47-49], this depends on dose and FMD  
347 virus strain, and there is marked individual variability in the onset of early clinical signs in pigs and  
348 cattle. It is important to note that the unit of interest in the present analysis is the farm and these  
349 epidemiological parameters are therefore observed at the farm-level, whereas most studies of the  
350 timing of onset of infectiousness and clinical signs focus on the animal-level. Also, the observed  
351 epidemiological data that informed our inferences were from field observations, rather than based  
352 on experimentation, and thereby include a certain level of uncertainty. Nonetheless, these  
353 epidemiological parameters are very helpful for informing disease response activities (quarantine  
354 periods, surveillance and contact-tracing windows), and estimates from observed outbreak such as

355 those presented here are vital for parameterising FMD simulation modelling. Similarly, the farm-  
356 level infectious period is a very important parameter, seemingly intuitive but given all the factors at  
357 play difficult to interpret. Often, as in the present analysis, the farm-level infectious period is cut  
358 short by culling and other disease control activities. In the 2010 outbreak of FMD in Japan, targeted  
359 vaccination was only implemented for 5 days at the peak of the outbreak [17], so was not  
360 considered to have had a major impact on the inference of epidemiological parameters.

361

362 With data augmenting MCMC approaches, as implemented here, reconstructing such outbreaks  
363 need not be completed years after the outbreaks are over. It is a primary intention of the design of  
364 these models that they be implemented to inform ongoing disease responses. Indeed, these models  
365 are presently being implemented in near-real time to inform the ongoing outbreak of *Mycoplasma*  
366 *bovis* in New Zealand [50]. As detailed in the present analysis, these models provide statistically  
367 justifiable inference of which premises were primary sources in an outbreak and the timing of  
368 exposure at those farms. This can greatly inform targeting of contact-tracing windows and farmer  
369 interviews to high-risk periods and help identify undetected sources of such outbreaks before  
370 further clusters can be seeded. An active area of further research includes incorporating contact-  
371 tracing and other animal movement data into this model. Further areas for development include  
372 refining the representation of genomic evolution through the implementation of within-host  
373 dynamics such as has been implemented in other transmission network models [10] and formally  
374 predicting undetected infections with Reversible-Jump MCMC or related methods [51].

375

376 The original attempts at FMD outbreak transmission network modelling have largely focussed on  
377 small subsets of large outbreaks [10, 12, 16, 52]. With the present modified formulation, we have  
378 demonstrated inference for outbreaks involving up to 400 premises, and with typically available  
379 parallel computing infrastructure it presently appears feasible to run inferences for outbreaks of



380 over 500 premises with some further efficiencies in coding. The present analysis was limited in the  
381 number of simulations that could be feasibly undertaken for model verification and pseudo-  
382 validation. However, we consider the additional gain in information will be modest with further  
383 testing on substantially increased numbers of simulation runs. In the present analysis, all models had  
384 difficulties inferring secondary transmission rates when these were very low. The best-performing  
385 model was again that with the modification to incorporate farm-level effects on transmissibility and  
386 susceptibility. The low value for  $\beta$  tested in verification run J3 was perhaps unrealistic being 100  
387 times below the inferred values based on the actual outbreak data from the 2010 outbreak in Japan.  
388 The mutation rate appears to be underestimated by all forms of the Lau model. This is not a major  
389 concern, as the primary purpose of this model is to infer the transmission network. More purposeful  
390 phylogenetic tools, such as BEAST and associated packages [35, 53], are preferable when the primary  
391 aim is estimation of such phylogenetic parameters and more sophisticated models including  
392 additional complexities such as within-host diversity are available. Nonetheless the mutation rates  
393 inferred by the modified Lau model overlapped with those of the SCOTTI model implemented in  
394 BEAST2.

395

396 The present analysis was limited in the number of simulations that could be feasibly undertaken.  
397 However, we consider the additional gain in information will be modest with further testing on  
398 substantially increased numbers of simulation runs. In the present analysis, all models had  
399 difficulties inferring secondary transmission rates when these were very low. The best-performing  
400 model was that with the modification to incorporate farm-level covariates.

401

402 There was poor agreement between the transmission networks inferred by SCOTTI and the Lau  
403 modified model. Reasons for differences in transmission network inferences include different  
404 underlying likelihood formulations and data requirements. Specifically, the Lau model infers

405 sequences for known IPs for which genomic data is unavailable and incorporates terms that account  
406 for the spatial relationships between infected premises. For four IPs that formed an isolated cluster  
407 in Ebino, in the far West of Miyazaki Prefecture, the sources inferred by Lau's modified model  
408 agreed very closely with epidemiological field data whereas the sources for all four of these  
409 premises inferred by SCOTTI were inferred to be over 60 km away. Whilst at least one of these  
410 premises is likely to have been infected from the main focus of infection to the East, it is highly  
411 unlikely that all four were infected in independent introductions. Considered together, the  
412 inferences of Lau and SCOTTI's models provide a reasonably complete epidemiological and  
413 phylogenetic inference for the Japanese outbreak.

414

## 415 **Conclusions**

416 Extending Lau's systematic Bayesian inference framework to incorporate additional parameters  
417 representing predominant species and numbers of animals held on a farm resulted in improvements  
418 in overall accuracy across a series of varied simulated outbreaks. Infected farms that held  
419 predominantly pigs were estimated to have five times the transmissibility of infected cattle farms  
420 and be 49% less susceptible. The farm-level incubation period was estimated to be 1 day shorter  
421 than the latent period, suggesting a small window following onset of clinical signs to target  
422 interventions may substantially reduce the risk of onwards transmission in future outbreaks.

423

424

425 **Acknowledgements**

426 This research was supported by an Australian Research Council Discovery Early Career Researcher  
427 Award (project number DE160100477) and by the Japanese Ministry of Agriculture, Forestry and  
428 Fisheries (Management Technologies for the Risk of Introduction of Livestock Infectious Diseases  
429 and Their Wildlife-borne Spread in Japan, FY2018-2022). Components of this research were  
430 undertaken on The University of Melbourne's High Performance Computing system SPARTAN [54].  
431 The AADIS model was initially developed by the Australian Government Department of Agriculture  
432 and Water Resources in collaboration with the University of New England and has kindly been made  
433 available to support this research. The funders had no role in study design, data collection and  
434 analysis, decision to publish or preparation of the manuscript. The authors would also like to  
435 acknowledge helpful comments on the research provided by colleagues in the National Institute of  
436 Animal Health, Japan and the Asia-Pacific Centre for Animal Health (University of Melbourne).

437

438 **Author contributions statement**

439 All authors were involved in design of the study. SF and YH conceived the modified model  
440 formulation with input from ML and RB. SF wrote the main manuscript text and implemented all  
441 analyses. All authors reviewed and commented on the manuscript.

442

443

## 444 References

- 445 1. Knight-Jones T, Rushton J. The economic impacts of foot and mouth disease—What are they,  
446 how big are they and where do they occur? *Prev Vet Med.* 2013;112(3-4):161-73.
- 447 2. McLaws M, Ribble C. Description of recent foot and mouth disease outbreaks in nonendemic  
448 areas: Exploring the relationship between early detection and epidemic size. *The Canadian*  
449 *Veterinary Journal.* 2007;48(10):1051.
- 450 3. Cottam EM, Wadsworth J, Shaw AE, Rowlands RJ, Goatley L, Maan S, et al. Transmission  
451 pathways of foot-and-mouth disease virus in the United Kingdom in 2007. *PLoS Pathog.*  
452 2008;4(4):e1000050.
- 453 4. Lin Y-L, Jong M-H, Huang C-C, Shieh HK, Chang P-C. Genetic and antigenic characterization of  
454 foot-and-mouth disease viruses isolated in Taiwan between 1998 and 2009. *Vet Microbiol.*  
455 2010;145(1-2):34-40.
- 456 5. Muroga N, Hayama Y, Yamamoto T, Kurogi A, Tsuda T, Tsutsui T. The 2010 foot-and-mouth  
457 disease epidemic in Japan. *J Vet Med Sci.* 2012;74(4):399-404.
- 458 6. Park J-H, Lee K-N, Ko Y-J, Kim S-M, Lee H-S, Shin Y-K, et al. Control of foot-and-mouth disease  
459 during 2010–2011 epidemic, South Korea. *Emerging Infect Dis.* 2013;19(4):655.
- 460 7. Jamal SM, Belsham GJ. Foot-and-mouth disease: past, present and future. *Vet Res.*  
461 2013;44(1):116.
- 462 8. Kao RR, Haydon DT, Lycett SJ, Murcia PR. Supersize me: how whole-genome sequencing and  
463 big data are transforming epidemiology. *Trends Microbiol.* 2014;22(5):282-91.
- 464 9. Hall M, Woolhouse M, Rambaut A. Epidemic reconstruction in a phylogenetics framework:  
465 transmission trees as partitions of the node set. *PLoS Comput Biol.* 2015;11(12):e1004613.
- 466 10. Klinkenberg D, Backer JA, Didelot X, Colijn C, Wallinga J. Simultaneous inference of  
467 phylogenetic and transmission trees in infectious disease outbreaks. *PLoS Comput Biol.*  
468 2017;13(5):e1005495.
- 469 11. Lau MS, Dalziel BD, Funk S, McClelland A, Tiffany A, Riley S, et al. Spatial and temporal  
470 dynamics of superspreading events in the 2014–2015 West Africa Ebola epidemic. *Proceedings of*  
471 *the National Academy of Sciences.* 2017;114(9):2337-42.
- 472 12. Lau MS, Marion G, Streftaris G, Gibson G. A systematic Bayesian integration of  
473 epidemiological and genetic data. *PLoS Comput Biol.* 2015;11(11):e1004633.
- 474 13. Morelli MJ, Thébaud G, Chadœuf J, King DP, Haydon DT, Soubeyrand S. A bayesian inference  
475 framework to reconstruct transmission trees using epidemiological and genetic data. *PLoS Comput*  
476 *Biol.* 2012;8(11):e1002768.
- 477 14. De Maio N, Wu C-H, Wilson DJ. SCOTTI: Efficient Reconstruction of Transmission within  
478 Outbreaks with the Structured Coalescent. *PLoS Comput Biol.* 2016;12(9):e1005130.
- 479 15. Firestone SM, Hayama Y, Bradhurst RA, Yamamoto T, Tsutsui T, Stevenson MA.  
480 Reconstructing outbreaks: a methods comparison of transmission network models. *Sci Rep.* 2019.
- 481 16. Cottam EM, Thébaud G, Wadsworth J, Gloster J, Mansley L, Paton DJ, et al. Integrating  
482 genetic and epidemiological data to determine transmission pathways of foot-and-mouth disease  
483 virus. *Proc R Soc Lond B Biol Sci.* 2008;275(1637):887-95.
- 484 17. Nishiura H, Omori R. An Epidemiological Analysis of the Foot-and-Mouth Disease Epidemic in  
485 Miyazaki, Japan, 2010. *Transbound Emerg Dis.* 2010;57(6):396-403.
- 486 18. Hayama Y, Muroga N, Nishida T, Kobayashi S, Tsutsui T. Risk factors for local spread of foot-  
487 and-mouth disease, 2010 epidemic in Japan. *Res Vet Sci.* 2012;93(2):631-5.
- 488 19. Muroga N, Kobayashi S, Nishida T, Hayama Y, Kawano T, Yamamoto T, et al. Risk factors for  
489 the transmission of foot-and-mouth disease during the 2010 outbreak in Japan: a case–control  
490 study. *BMC Vet Res.* 2013;9(1):150.
- 491 20. Nishi T, Yamada M, Fukai K, Shimada N, Morioka K, Yoshida K, et al. Genome variability of  
492 foot-and-mouth disease virus during the short period of the 2010 epidemic in Japan. *Vet Microbiol.*  
493 2017;199:62-7.

- 494 21. Wada M, Stevenson M, Cogger N, Carpenter T. Evaluation of the Control Strategy for the  
495 2010 Foot-and-Mouth Disease Outbreak in Japan Using Disease Simulation. *Transbound Emerg Dis.*  
496 2016. doi: 10.1111/tbed.12467. PubMed PMID: 26748445.
- 497 22. Akashi H. The 2010 Foot-and-Mouth Disease Outbreak in Miyazaki Prefecture. *Journal of*  
498 *Disaster Research.* 2012;7(3):252-7.
- 499 23. Hayama Y, Yamamoto T, Kobayashi S, Muroga N, Tsutsui T. Mathematical model of the 2010  
500 foot-and-mouth disease epidemic in Japan and evaluation of control measures. *Prev Vet Med.*  
501 2013;112(3-4):183-93.
- 502 24. Tildesley MJ, Deardon R, Savill NJ, Bessell PR, Brooks SP, Woolhouse MEJ, et al. Accuracy of  
503 models for the 2001 foot-and-mouth epidemic. *Proc R Soc Lond B Biol Sci.* 2008;275(1641):1459-68.  
504 doi: 10.1098/rspb.2008.0006. PubMed PMID: ISI:000255503300014.
- 505 25. Alexandersen S, Zhang Z, Donaldson A, Garland A. The pathogenesis and diagnosis of foot-  
506 and-mouth disease. *J Comp Pathol.* 2003;129(1):1-36.
- 507 26. Keeling MJ, Woolhouse MEJ, Shaw DJ, Matthews L, Chase-Topping M, Haydon DT, et al.  
508 Dynamics of the 2001 UK foot and mouth epidemic: stochastic dispersal in a heterogeneous  
509 landscape. *Sci.* 2001;294(5543):813-7. PubMed PMID: ISI:000171851800036.
- 510 27. Lau MS. Novel Bayesian inference in epidemics – model assessment and integrating  
511 epidemiological and genetic data: Heriot-Watt University; 2015.
- 512 28. Sellke T. On the asymptotic distribution of the size of a stochastic epidemic. *Journal of*  
513 *Applied Probability.* 1983;20(2):390-4.
- 514 29. Bradhurst RA, Roche SE, East IJ, Kwan P, Garner MG. A hybrid modeling approach to  
515 simulating foot-and-mouth disease outbreaks in Australian livestock. *Frontiers in Environmental*  
516 *Science.* 2015;3:17.
- 517 30. Rambaut A, Grass NC. Seq-Gen: an application for the Monte Carlo simulation of DNA  
518 sequence evolution along phylogenetic trees. *Bioinformatics.* 1997;13(3):235-8.
- 519 31. Martin DP, Murrell B, Golden M, Khoosal A, Muhire B. RDP4: Detection and analysis of  
520 recombination patterns in virus genomes. *Virus evolution.* 2015;1(1).
- 521 32. Kumar S, Stecher G, Tamura K. MEGA7: molecular evolutionary genetics analysis version 7.0  
522 for bigger datasets. *Mol Biol Evol.* 2016;33(7):1870-4.
- 523 33. Gelman A, Rubin DB. Inference from iterative simulation using multiple sequences. *Statistical*  
524 *science.* 1992;457-72.
- 525 34. Rambaut A, Drummond AJ, Xie D, Baele G, Suchard MA. Posterior summarisation in Bayesian  
526 phylogenetics using Tracer 1.7. *Syst Biol.* 2018;10.
- 527 35. Bouckaert R, Heled J, Kühnert D, Vaughan T, Wu C-H, Xie D, et al. BEAST 2: a software  
528 platform for Bayesian evolutionary analysis. *PLoS Comput Biol.* 2014;10(4):e1003537.
- 529 36. Hasegawa M, Kishino H, Yano T-a. Dating of the human-ape splitting by a molecular clock of  
530 mitochondrial DNA. *J Mol Evol.* 1985;22(2):160-74.
- 531 37. Firestone SM, Lau MSY, Kodikara S, Demirhan H, Hayama Y, Yamamoto T, et al. Bayesian  
532 Outbreak Reconstruction Inference and Simulation (BORIS). GitHub repository,  
533 <https://github.com/sfires/BORIS>, accessed 24/6/2019); 2019.
- 534 38. R Core Team. R: A language and environment for statistical computing. R Foundation for  
535 Statistical Computing, Vienna, Austria.: <http://www.R-project.org/>, accessed 24/6/2019); 2019.
- 536 39. Stevenson M, Nunes T, Heuer C, Marshall J, Sanchez J, Thornton R, et al. epiR: Tools for the  
537 Analysis of Epidemiological Data. R package version 0.9-96. 2018.
- 538 40. Handcock MS, Hunter DR, Butts CT, Goodreau SM, Morris M. statnet: Software Tools for the  
539 Representation, Visualization, Analysis and Simulation of Network Data. *Journal of Statistical*  
540 *Software.* 2008;24(1):1-11.
- 541 41. Plummer M, Best N, Cowles K, Vines K. CODA: Convergence Diagnosis and Output Analysis  
542 for MCMC. *R News.* 2006;6:7-11.
- 543 42. Wickham H. ggplot2: elegant graphics for data analysis: Springer; 2016.

- 544 43. Pfeiffer CN, Campbell AJD, Firestone SM, Larsen JWA, Stevenson MA. Sample size  
545 considerations for livestock movement network data. *Prev Vet Med.* 2015;122:399–405.
- 546 44. Hayama Y, Firestone SM, Stevenson MA, Yamamoto T, Shimizu Y, Tsutsui T. Reconstructing a  
547 transmission network and identifying risk factors of secondary transmissions in the 2010 FMD  
548 outbreak in Japan. *Transbound Emerg Dis.* 2019.
- 549 45. Mardones F, Perez A, Sanchez J, Alkhamis M, Carpenter T. Parameterization of the duration  
550 of infection stages of serotype O foot-and-mouth disease virus: an analytical review and meta-  
551 analysis with application to simulation models. *Vet Res.* 2010;41(4):45.
- 552 46. Charleston B, Bankowski BM, Gubbins S, Chase-Topping ME, Schley D, Howey R, et al.  
553 Relationship between clinical signs and transmission of an infectious disease and the implications for  
554 control. *Sci.* 2011;332(6030):726-9.
- 555 47. Sellers R, Parker J. Airborne excretion of foot-and-mouth disease virus. *Epidemiol Infect.*  
556 1969;67(4):671-7.
- 557 48. Fukai K, Morioka K, Yoshida K. An experimental infection in pigs using a foot-and-mouth  
558 disease virus isolated from the 2010 epidemic in Japan. *J Vet Med Sci.* 2011;73(9):1207-10.
- 559 49. Onozato H, Fukai K, Kitano R, Yamazoe R, Morioka K, Yamada M, et al. Experimental  
560 infection of cattle and goats with a foot-and-mouth disease virus isolate from the 2010 epidemic in  
561 Japan. *Arch Virol.* 2014;159(11):2901-8.
- 562 50. Browning G, Caswell J, Cobb S, Fox L, French N, Humphris M, et al. Technical Advisory Group  
563 report to Ministry of Primary Industries New Zealand: TAG response 17 May 2018: Feasibility of  
564 eradication of *Mycoplasma bovis*. 2018.
- 565 51. Jewell CP, Keeling MJ, Roberts GO. Predicting undetected infections during the 2007 foot-  
566 and-mouth disease outbreak. *J R Soc Interface.* 2009;6(41):1145-51. doi: 10.1098/rsif.2008.0433.  
567 PubMed PMID: ISI:000271464500004.
- 568 52. Jombart T, Cori A, Didelot X, Cauchemez S, Fraser C, Ferguson N. Bayesian reconstruction of  
569 disease outbreaks by combining epidemiologic and genomic data. *PLoS Comput Biol.*  
570 2014;10(1):e1003457.
- 571 53. Drummond AJ, Suchard MA, Xie D, Rambaut A. Bayesian phylogenetics with BEAUti and the  
572 BEAST 1.7. *Mol Biol Evol.* 2012;29(8):1969-73.
- 573 54. Lafayette L, Sauter G, Vu L, Meade B. Spartan Performance and Flexibility: An HPC-Cloud  
574 Chimera, OpenStack Summit, Barcelona2016.

575

576

577 **Table 1: Key parameters in the Bayesian MCMC inference.**

| Parameter                                 | Type     | Description                                                                                                       |
|-------------------------------------------|----------|-------------------------------------------------------------------------------------------------------------------|
| $t.samp_j, S_j$                           | Observed | The timing of sampling and available sequences for infected premises in the dataset.                              |
| $\psi_j, t_{e_j}, t_{i_j}$                | Latent   | The source and timing of exposure and onset of infectiousness for each exposed site $j$ .                         |
| $Gt_j$                                    | Latent   | The sequence on each infected premises at each sampling and transmission time ( $t$ ).                            |
| $\alpha$                                  | Latent   | The background rate of infection.                                                                                 |
| $\beta, \beta_{ij}$                       | Latent   | The secondary transmission rate, with and without additional farm-level covariates.                               |
| $d_{ij}$                                  | Observed | Euclidean distance between premises $i$ and $j$ .                                                                 |
| $\kappa$                                  | Latent   | The power of the spatial transmission kernel.                                                                     |
| $n_i, n_j$                                | Observed | Number of animals on premises $i$ and $j$ .                                                                       |
| $\nu$                                     | Latent   | The effect (power) of number of animals on premises-level infectivity for farms.                                  |
| $\tau$                                    | Latent   | The effect (power) of number of animals on premises-level susceptibility for farms.                               |
| $\phi_{cattle}, \phi_{pig}, \phi_{other}$ | Latent   | The multiplicative effect of predominant species on premises-level infectivity.                                   |
| $\rho_{pig}, \rho_{other}$                | Latent   | The multiplicative effect of predominant species on premises-level susceptibility.                                |
| $\mu_1, \mu_2$                            | Latent   | The rates of transitions and transversions.                                                                       |
| $mean(lat), var(lat)$                     | Latent   | The mean and variance of the duration of the farm-level latent period.                                            |
| $c$                                       | Latent   | The mean period from onset of infectiousness to the last day of culling (i.e., the farm-level infectious period). |
| $p$                                       | Latent   | Probability that a nucleotide base of a primary sequences differs from that in the universal master sequence.     |

578

579 **Table 2: Epidemiological and phylogenetic parameters inferred for the 2010 outbreak of foot-and-mouth disease in Miyazaki Prefecture, Japan, by**  
580 **transmission network model.**

| <b>Model parameter (units)</b>                                        | <b>Lau's joint inference, modified</b><br>Posterior Median [95% HPD]    | <b>Structured Coalescent Transmission</b><br><b>Tree Inference</b> Posterior Median [95%<br>HPD] |
|-----------------------------------------------------------------------|-------------------------------------------------------------------------|--------------------------------------------------------------------------------------------------|
| Primary transmission rate, $\alpha$                                   | $4.0 \times 10^{-5}$ [ $0.1 \times 10^{-5}$ , $2.1 \times 10^{-4}$ ]    | —                                                                                                |
| Secondary transmission rate, $\beta$                                  | 0.063 [0.016, 0.142]                                                    | —                                                                                                |
| Mutation rate (substitutions site <sup>-1</sup> day <sup>-1</sup> )   | $1.83 \times 10^{-5}$ [ $1.63 \times 10^{-5}$ , $2.06 \times 10^{-5}$ ] | $2.31 \times 10^{-5}$ [ $1.73 \times 10^{-5}$ , $2.89 \times 10^{-5}$ ]                          |
| Transition to transversion ratio                                      | 6.95 [5.20, 9.57]                                                       | 10.12 [6.68, 14.33]                                                                              |
| Delay from origin of epidemic to outbreak detection (days)            | 30.9 [25.9, 42.3]                                                       | 38.5 [24.4, 56.5]                                                                                |
| Effective population size <sup>a</sup>                                | —                                                                       | 18.9 [8.6, 34.5]                                                                                 |
| Number of farms infected at outbreak detection                        | 15 [11, 30]                                                             | —                                                                                                |
| Farm-level incubation period (days)                                   | 5.6 [2.6, 13.8]                                                         | —                                                                                                |
| Farm-level latent period, <i>mean(lat)</i> (days)                     | 6.8 [5.2, 8.1]                                                          | —                                                                                                |
| Farm-level infectious period, <i>c</i> (days)                         | 15.2 [13.6, 17.2]                                                       | —                                                                                                |
| Spatial kernel scaling parameter, $\kappa$                            | 1.79 [1.54, 2.04]                                                       | —                                                                                                |
| Infectivity of pig farms vs. cattle farms, $\phi_{\text{pigs}}$       | 5.15 [2.64, 11.59]                                                      | —                                                                                                |
| Infectivity of other farms vs. cattle farms, $\phi_{\text{other}}$    | 0.50 [0.11, 1.67]                                                       | —                                                                                                |
| Effect of farm size on infectivity, $\nu$                             | 0.08 [0.00, 0.26]                                                       | —                                                                                                |
| Susceptibility of pig farms vs. cattle farms, $\rho_{\text{pigs}}$    | 0.51 [0.30, 0.83]                                                       | —                                                                                                |
| Susceptibility of other farms vs. cattle farms, $\rho_{\text{other}}$ | 0.45 [0.14, 1.22]                                                       | —                                                                                                |
| Effect of farm size on susceptibility, $\tau$                         | 0.23 [0.11, 0.35]                                                       | —                                                                                                |

581 HPD = Highest probability density region; IP = infected premises. <sup>a</sup> Estimated from structured coalescent migratory model based on within-host (here, within-farm) effective  
582 population size ( $N_e$ ), migration rate and proportion of hosts with consensus support that their source was sampled.



583 **Figure legends**

584

585 **Figure 1: Comparison of the accuracy of inferences of proposed sources of infection for six**  
586 **simulated outbreaks of foot-and-mouth disease in Japan and Australia.** Black line = original  
587 formulation; red = modified model. Runs J1, J2 and J3 simulated in the same framework as the  
588 modified model. Runs A1, A2, A3 simulated in using the Australian Animal Disease Simulation model.  
589 Accuracy was defined as the proportion of infected premises for which the true source was the  
590 proposed source with the highest posterior probability density. Vertical reference lines denote  
591 proposed ancestors with >50% and >80% model support, respectively.

592

593 **Figure 2: Inferred transmission network for the 2010 outbreak of foot-and-mouth disease in**  
594 **Miyazaki Prefecture, Japan, in arbitrary space.** Model support for the proposed ancestor  
595 represented by edge width. Darker shading of edges represents earlier inferred transmission events  
596 in the outbreak. Farms holding predominantly pigs, cattle and other species are represented by pink,  
597 white and blue nodes, respectively. Case numbers randomised for confidentiality.

598

599 **Figure 3: Inferred spatial transmission kernel shape for the 2010 outbreak of foot-and-mouth**  
600 **disease in Miyazaki Prefecture, Japan.** Bold line represents posterior median prediction and dashed  
601 lines represent 95% highest probability density region.

602

603 **Figure 4: Estimated transmission windows based on Cottam's frequentist approach for the first 20**  
604 **infected premises detected for which genomic data were available in the 2010 outbreak of foot-**  
605 **and-mouth disease in Miyazaki Prefecture, Japan.** Black lines represent most likely period of the  
606 earliest infection of an animal on each infected premises (IP), grey lines represent estimated  
607 duration of infectiousness at the premises level, tapering as culling commences. The red reference  
608 line represents the point of outbreak detection on 20 April 2010. On the most likely day that Farm B  
609 was infected, only Farm A was possibly infectious.

610

611 **Supplementary Materials**

612

613 **S1: Simulated outbreak datasets: data and parameterisation.**

614

615 **S2: Comparison of the accuracy of the original model and modifications of Lau's joint Bayesian**  
616 **transmission network inference for inferring sources for simulated outbreaks of foot-and-mouth**  
617 **disease in Japan and Australia.**

618

619 **S3: Comparison of the accuracy of the original model and modifications of Lau's joint Bayesian**  
620 **transmission network inference for inferring epidemiological and phylogenetic parameters for**  
621 **simulated outbreaks of foot-and-mouth disease in Japan and Australia.** Model formulations  
622 abbreviated as follows: orig = original; mod = modified; mod-n = modified-normalised.

623

624 **S4: Nucleotide substitution model fit for genomic data from the 2010 outbreak of foot-and-mouth**  
625 **disease in Japan.**

626

627 **S5: Lau model (original and modified-normalised) inferred transmission networks and estimates**  
628 **for the 2010 outbreak of foot-and-mouth disease in Miyazaki Prefecture, Japan.**

629

**Run: J1**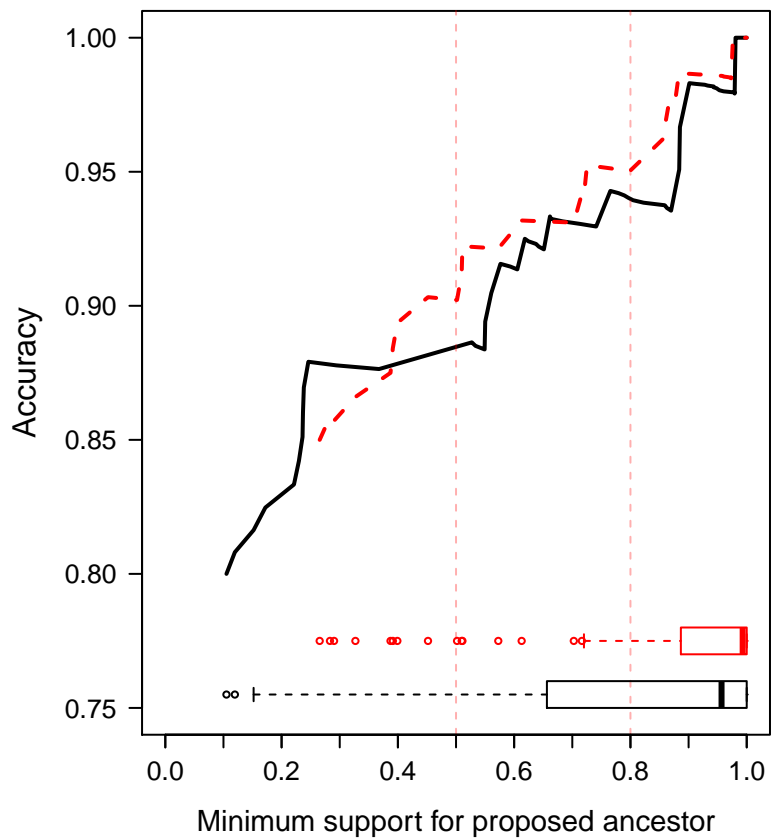**Run: J2**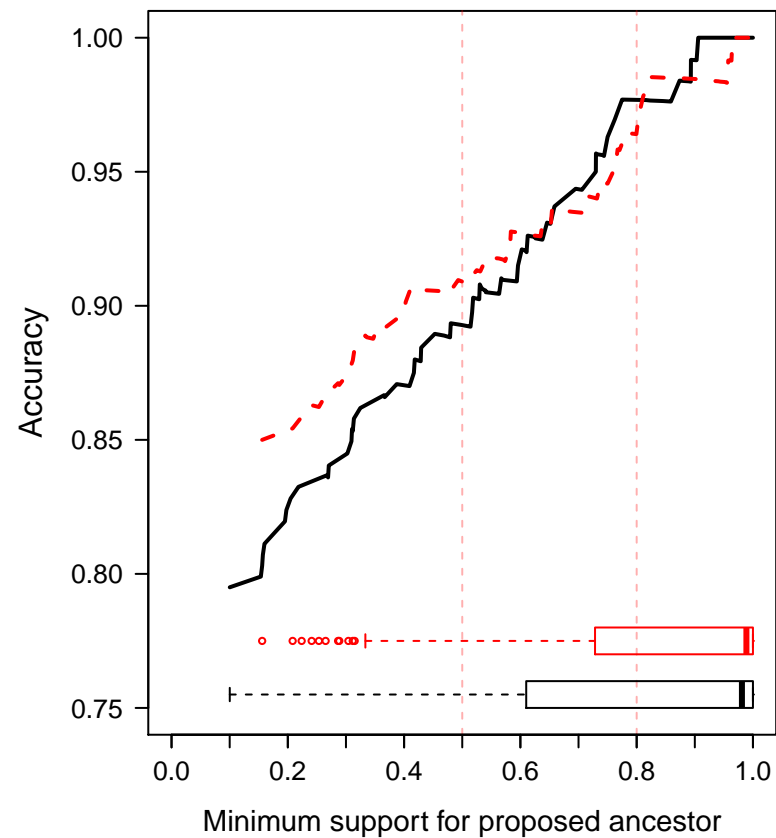**Run: J3**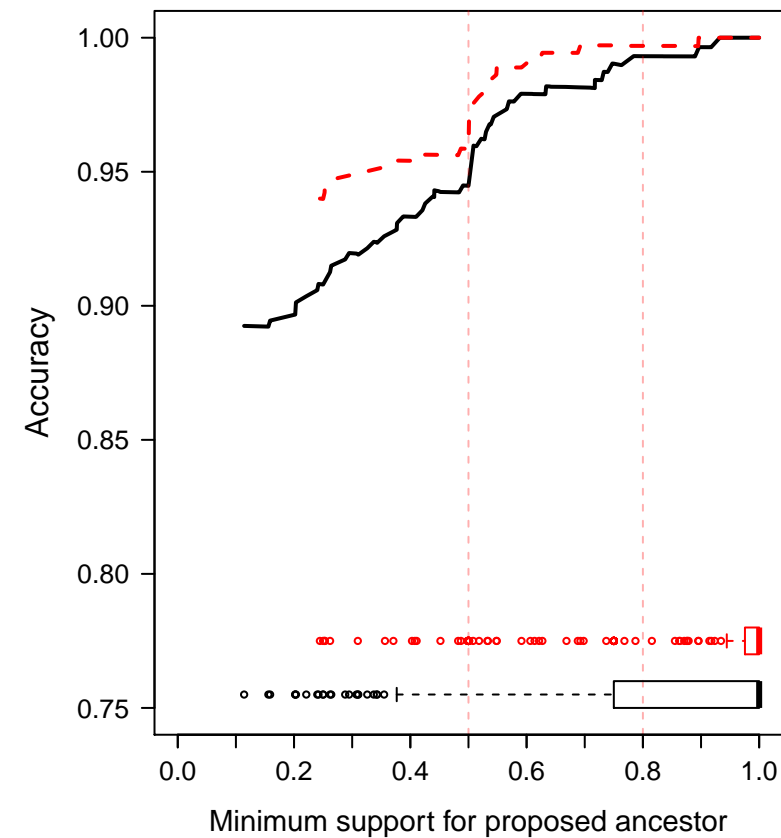**Run: A1**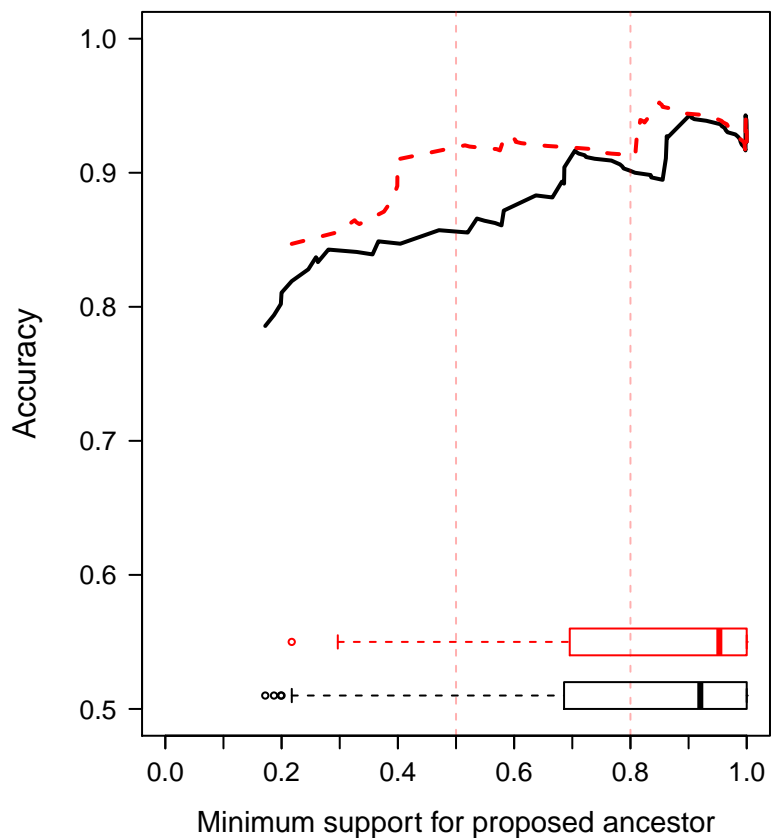**Run: A2**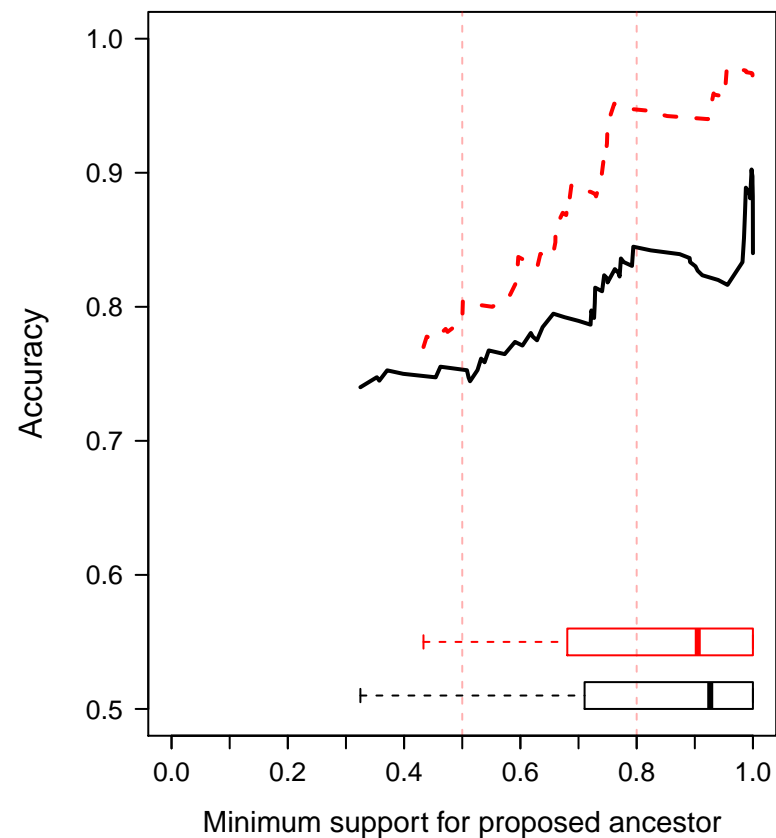**Run: A3**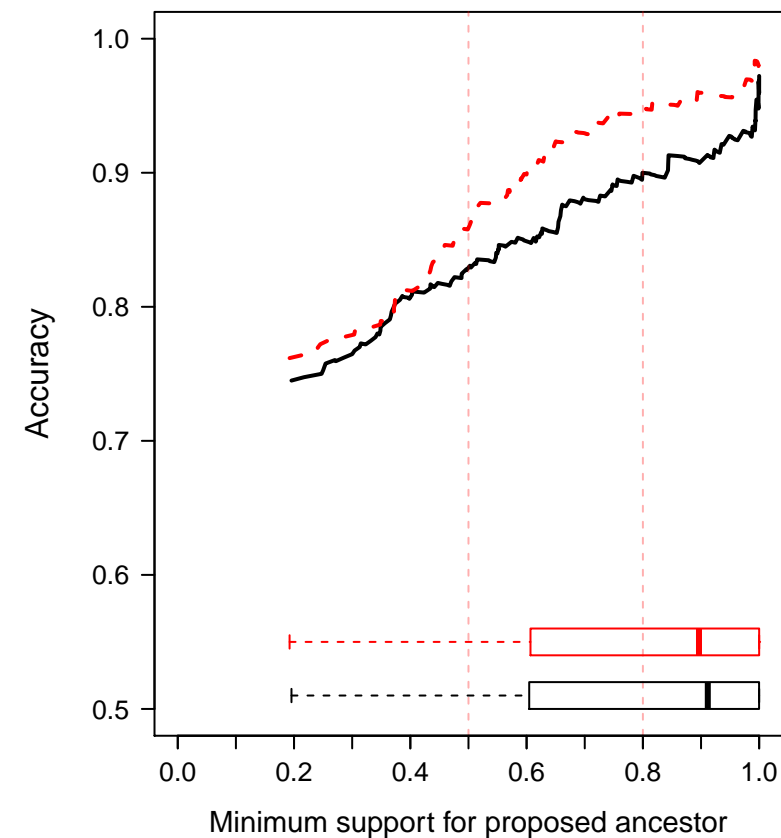

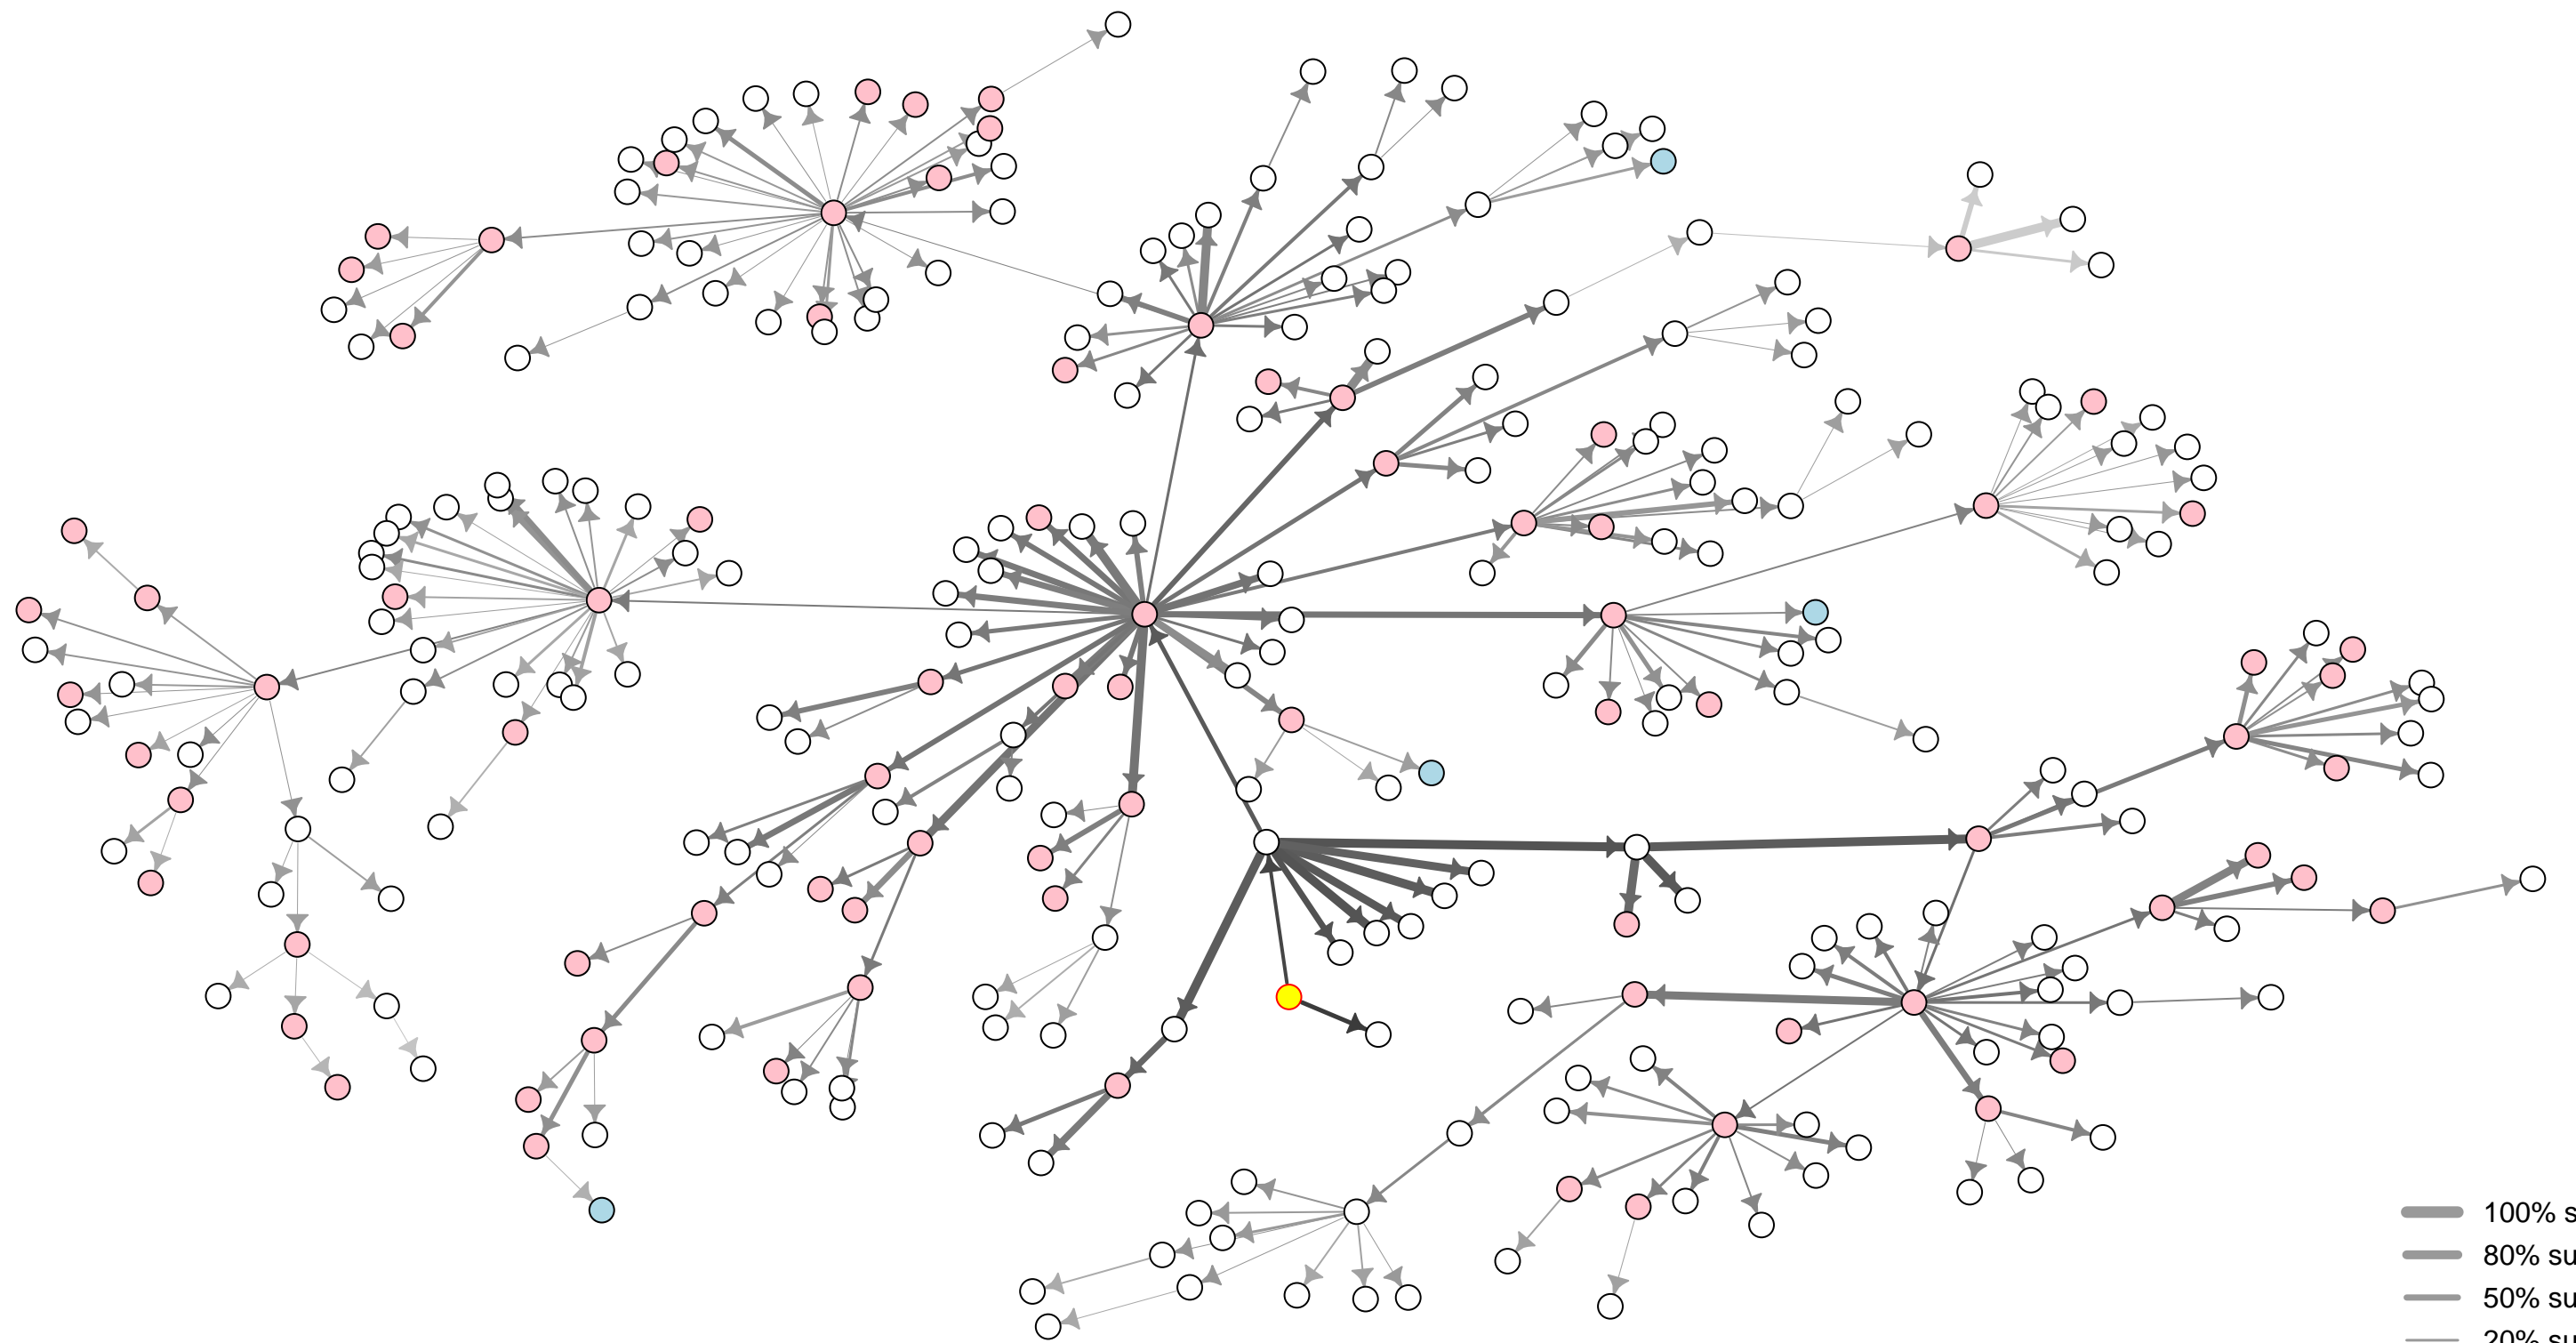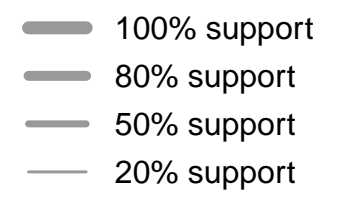

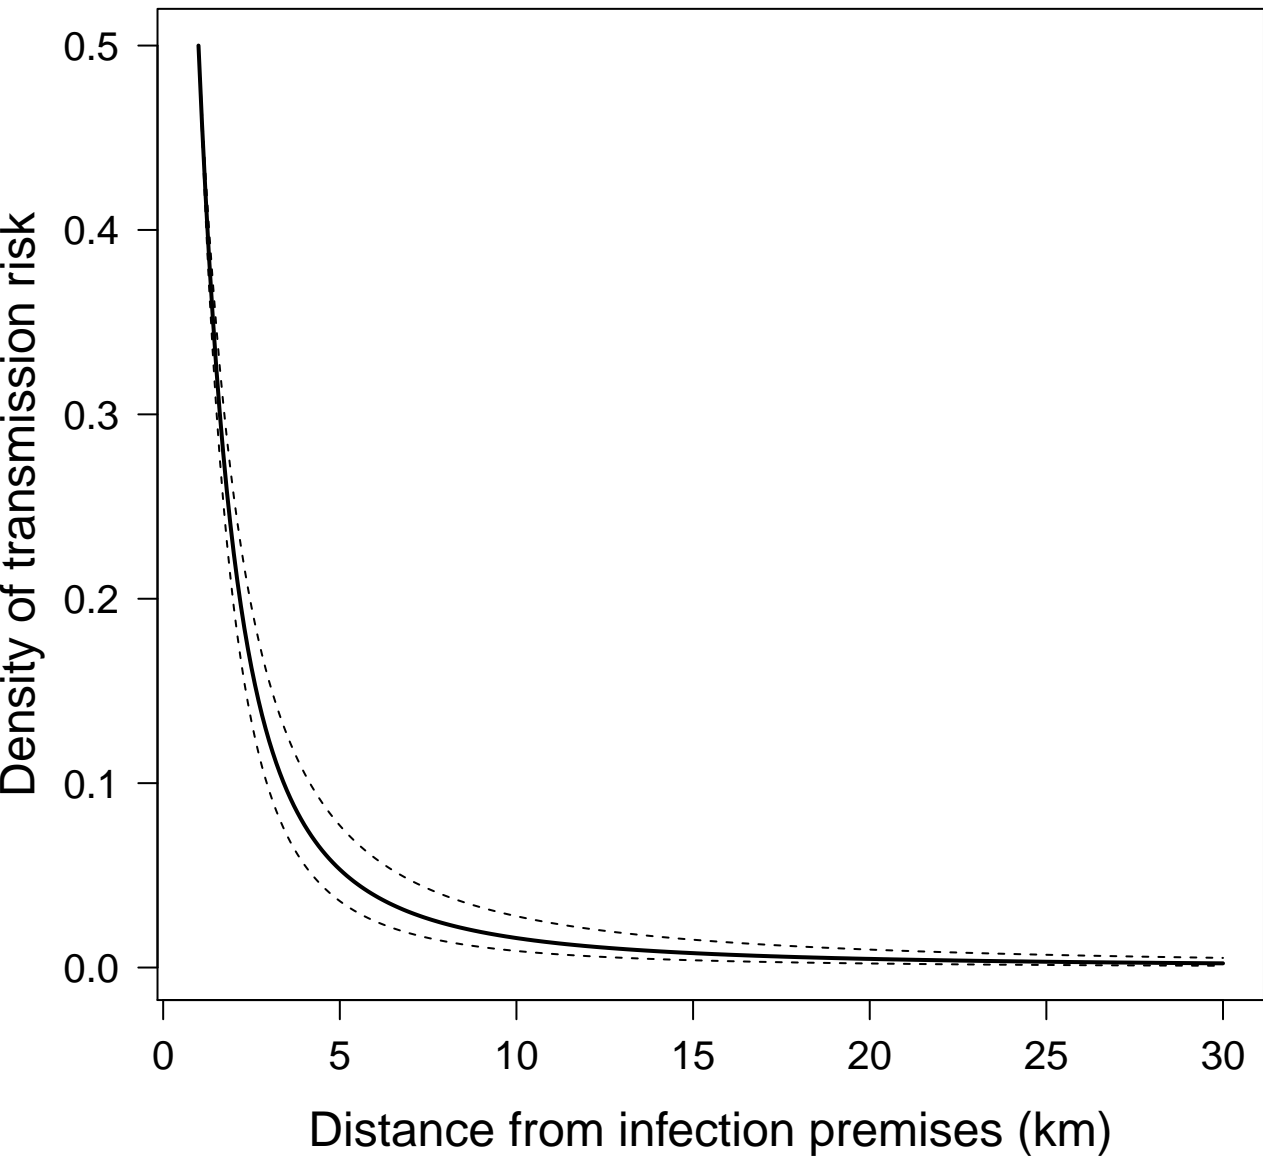

# Temporal risk windows

Farm ID

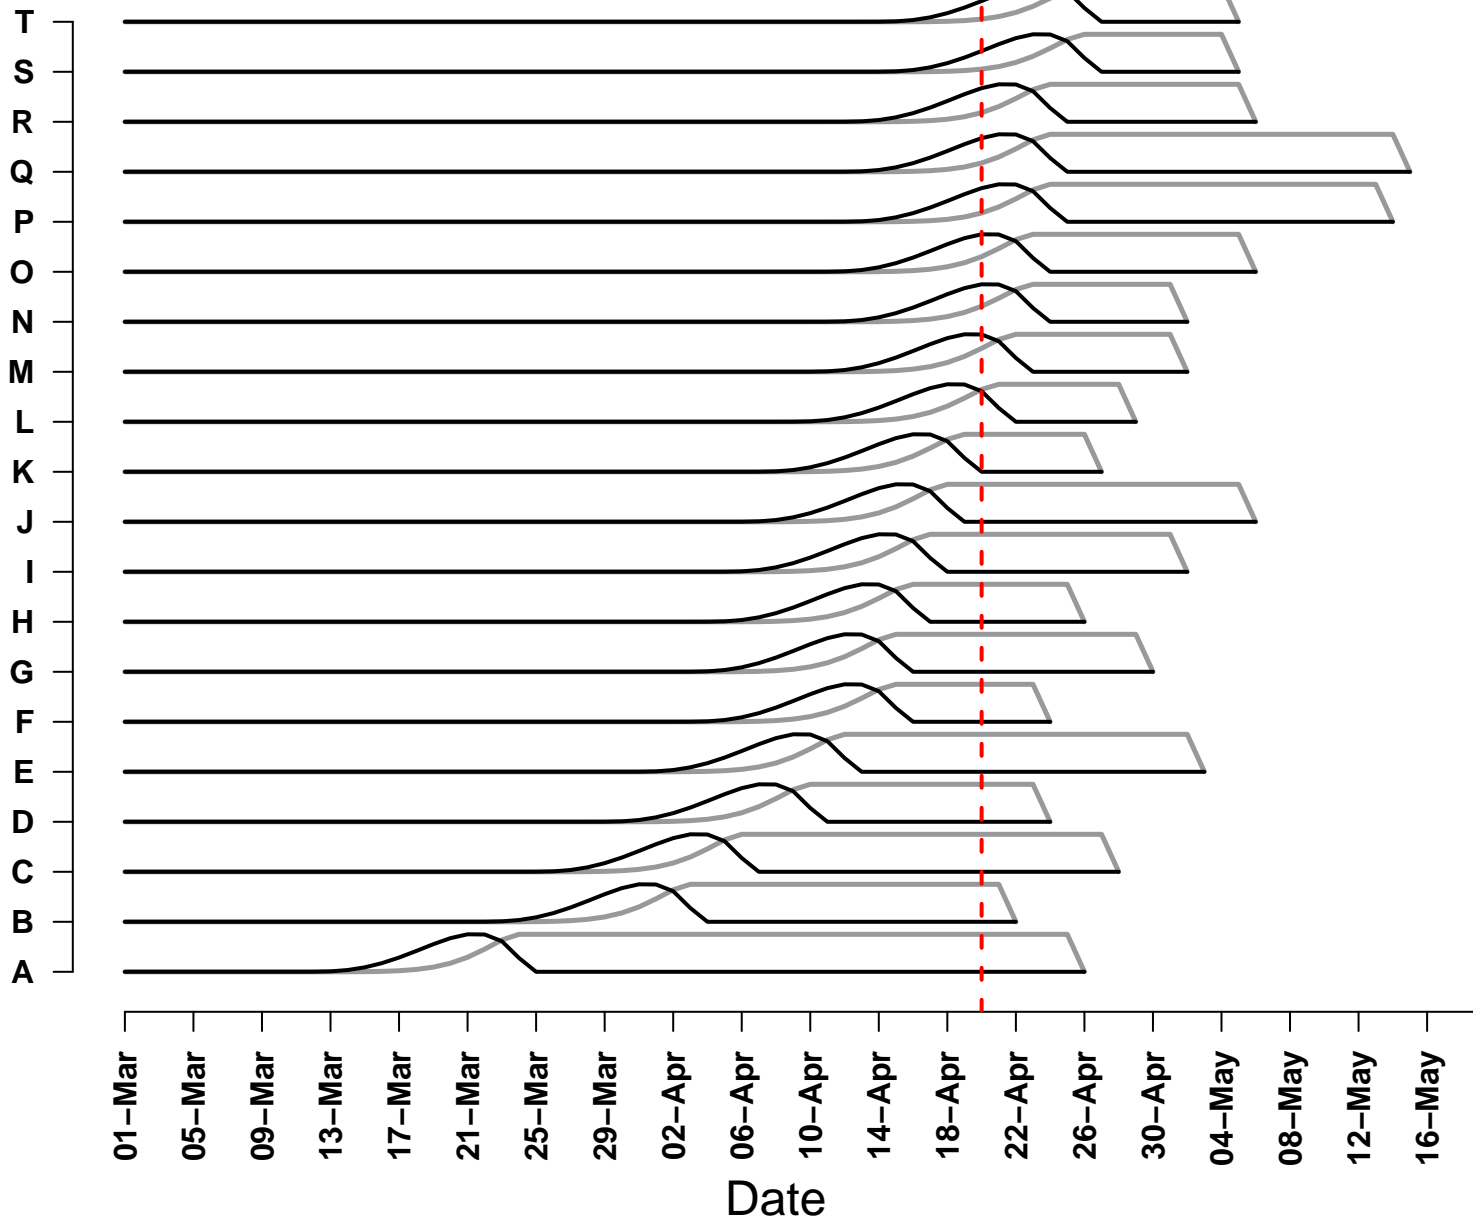

Source: https://www.biorxiv.org/content/10.1101/835421v1.full.pdf
